# Supplementary material
Source: PubMed Central journal article supplement (PMC10530332)
Supplement: NIHMS1917838-supplement-1.pdf [file NIHMS1917838-supplement-1.pdf]

TATA box

CCTTCAGAACGAGCGGGAAATGTAACAACACTAACAACGCACTCGTTCCAAATCCAGTGCAATGAATATAATTCAAT  
GAATTGGTCAGTTTTAGAGGAAAGTTTTCCCGTTCAGTACAAGGTACCATTGGAGTTATTTATGCCAGACTTCACGA  
GTGAACGATTAACCTGTACAACAGTCTGTTGCAATAAGTGGATCAGACTGGGGAGGGTCCACGGGAGGTCAATATT  
CAGCAGCCAACCTCTGTCTTACTTTTTCAGTTGAGCCACTGAACCACTCGGAGGCAACCAAATGCCTCTCAGTCATCTCA  
AACAGGCCTAAGATCCAAAGCTAATTACAGATTGCCATTTGCGAAGAATTTGCCGAGAGCTCAAAGAATGTGGCAA

5' UTR M W Q

GTTCTGTTCTTGCTCGCTGCCCTTGCAAGT --> 1841bp AGGCCCTTTGACAGCTGA  
V L F L L A A L A G P L T A D

TGACTCTCTATATCTCGCCATATCTCTGAGTCGCTGGGAAAATGAAACAGTGACGTTGAATTGTTTCACCTCCA  
D T L Y I S P I S L S R W E N E T V T L N C F T S

GGACTGTGGATAATTATTACCTCATCTGGGGATCCGCCAAGCCGGGAGATCTCATGATCTCGTGGATTCTTTACTGG  
R T V D N Y Y L I W G S A K P G D L M I S W I L Y W

ATGCCGGGATCGAGTGTCTCTTTACCCGTCCTGGTTCAGCGATCGCTTCATTGGCTCAAAGGACTGGACCAGCAA  
M P G S S A A L Y P S V V S D R F I G S K D W T S K

GAAGTTCTCACTGACAATAAAAGGTCTCCGACAAGAAGATTCAGCCAGATATTATTGTGGCAGCTCAAACACTTACT  
K F S L T I K G L R Q E D S A R Y Y C G S S N T Y

TCCCATTGACGACAGACTGGAGCGGATGTGGAGTCACGCTCACTGTTAAAGCAGGT --> 2625bp  
F P F S T D W S G C G V T L T V K A

ATCAGTGTGAGCCGTAATTAACCTTGTGGCCACTTAGTAACAGATTCATTTCCATTTTCAGCTCCCTCAGTGTCTCC  
A P S V S P

TCCGTTGGTTTTATTTCCAAAACCCACACCCTGAGGATGTCTTTCTCCGGAAGAACATCTCGCTGCTCTGTGCGGCAG  
P L V Y F Q N P H P E D V F L R K N I S L L C A A

AAAGCTTTTACCCGGACGACCTCTCATTTTCTGGCGTGTGATGGTGAGCAGGTCCACAGAGGGGTCTCGCATTCT  
E S F Y P D D L S F S W R V D G E Q V H R G V S H S

GCCTCACTTTTGGGAGACAACGGCACCTACACAGCGATCAGTAAGCTGGTATCAATACATCCCAGTGGATCAAAGG  
A S L L G D N G T Y T A I S K L V I N T S Q W I K G

ATCTATTATCAGCTGCCAAGTATCACATGGGGCACTGCCTTCTCCCATCATCAAGCACATAAGTAACACTGGT  
S I I S C Q V S H G A L P S P I I K H I S N T

--> 2287bp GACAGACTCAGTTGTGATTGTTACACAGAGCGGTACCCCATGGAGCCAAAGCTGTAT  
E R Y P M E P K L Y

CTCCTGTCACCGACTTTAGAAGAGCTCGTCACAATGGAAAAAGCAACCCTGGTCTGCCTAGCAACTGGCTTCTACCC  
L L S P T L E E L V T M E K A T G L V C L A T G C F Y P

AGCGGAGATCTCTTTCCATTGGTTCATCAATGGCAATCCGGTGGTGCAGCAGCATCAAGATCTACCCACCAATTCTCA  
A E I S F H W F I N G N P V V D S I K I Y P P I L

ATATCAACGGCACCTACTCTCCAGAGTGAAGTACCACATCTGATCAAATGTGGAACCGGGGTACAGAATACACT  
N I N G T Y S S Q S E L T T S D Q M W N R G T E Y T

TGTGAGATTGAGCAGTGTGAGTCCAGACAGCATCATTCAAACCATCAATAAAACCCGGGT --> 1837bp  
C E I Q H M S V P D S I I Q T I N K T R

TTAAGGGAAAATGTCTGTTGATTGAAATGTTTTATCTCTGCCTGTAACAGAATTTATTTTCCCAACCGACGATAA  
E F I F L Q P T I

CCCCCATCAAGGTTGAGTACGTCGACTCCCGTCCGCCACAAGCTGTGACGTTGGCGTGTGTTTGTTCGGGGTCTAT  
T P I K V Q S R D S R R P Q A V T L A C F V S G F Y

CCCGCCGGGATCTATGTGAAGTGGAGAACGGAGAGGGATTTGCAAGTTCGGGCAGTGTGACCAACTTCCAGTGGT  
P A G I Y V N W R T E R D L Q V P G S V T N F P V V

GAGGGACGTGAGTGGGACCTACAGTACAGTCAGTCAGATGACCATTGCCTTTGTGGATGTGGACCCCACTCAGACGT  
R D V S G T Y S T V S Q M T I A F V D V D P T Q T

ATATGTGTGAGGTGAGACAGGATCTCTACCAACCCTTTAAGGGAACGGTTTCAGATAAGGTAACGCCTCAATGT  
Y M C E V R H E S L T N P L R E R F Q I R

GATGGGACGTGTAAGTGTGTGAGCTGCCCCTTGGCTCAGTATTTACACCTCGATGGGAAGGCAGGTGAGTGTG  
-->2779bp CGTTAACGTGCCGTTATGAACCTGCTGTTGAACCAATGTTTCTTTTTCAGATGACATTC  
\* 3' UTR

CTGCCAAGGACTGATCCAATCATCTGAAATCTTCATATGTCTTCAACAACGAAACACTGGAGTGACATTCCCAGTCG  
GACATGGAGCTATTCCATTCTTACCCACTCACGGTGAATTTGAAACTATTAATAATAAAAAGAATATTTTCCCCTTTA  
ACTGAATGTTAAACAAAACAGACAATTTTAGGTAATGAATAACTGATCTCTAAGGATTGTGAATTCATCTTAGAGAT  
GTTGCAAGCATTAATAAAAAAATTACCTTGGCTTAATTATTTGTTTCAAGTAATATAGTGGCTTTAAGGGGTGAG

Poly(A) signal site

**Supplemental Fig 1. Genomic organization of nurse shark UrIg.** Introns were shortened with size indicated at the junctions.

A)

|                |                                                               |           |     |
|----------------|---------------------------------------------------------------|-----------|-----|
|                | Leader                                                        | V domain  |     |
| GIWU01140356.1 | MWQVLFLLAALAGPLTADDTLYISPIISLRWENETVTLNCFTSRTVDNYYLWGSAPKPGD  |           | 60  |
| GIWU01140354.1 | MWQVLFLLAALAGPLTADDTLYISPIISLRWENETVTLNCFTSRTVDNYYLWGSAPKPGD  |           | 60  |
|                | *****                                                         |           |     |
| GIWU01140356.1 | LMISWILYWMPGSSAALYPSVSDRFIGSKDWTSKKFSLTIKGLRQEDSARYYCGSSNTY   |           | 120 |
| GIWU01140354.1 | LMISWILYWMPGSSAALYPSVSDRFIGSKDWTSKKFSLTIKGLRQEDSARYYCGSSNTY   |           | 120 |
|                | *****                                                         |           |     |
|                |                                                               | C1 domain |     |
| GIWU01140356.1 | FPFSTDWSGCGVTLTVKAAPSVSPPLVYFQNPHPEDVFLRKNISLLCAAESFYPDDLFSFS |           | 180 |
| GIWU01140354.1 | FPFSTDWSGCGVTLTVKAAPSVSPPLVYFQNPHPEDVFLRKNISLLCAAESFYPDDLFSFS |           | 180 |
|                | *****                                                         |           |     |
| GIWU01140356.1 | WRVDGEQVHRGVSHSASLLGDNGTYTAISKLVINTSQWIKGSIISCQVSHGALPSPIIKH  |           | 240 |
| GIWU01140354.1 | WRVDGEQVHRGVSHSASLLGDNGTYTAISKLVINTSQWIKGSIISCQVSHGALPSPIIKH  |           | 240 |
|                | *****                                                         |           |     |
|                |                                                               | C2 domain |     |
| GIWU01140356.1 | ISNT-----                                                     |           | 244 |
| GIWU01140354.1 | ISNTERYPMEPKLYLLSPTLEELVTMEKATLVCLATGFYPAEISFHWFINGNPVVDSEIKI |           | 300 |
|                | ****                                                          |           |     |
|                |                                                               | C3 domain |     |
| GIWU01140356.1 | -----EFIFLQPTI                                                |           | 253 |
| GIWU01140354.1 | YPPILNINGTYSSQSELTTSQMWNRGTEYTCETQHMSVPDSIIQTINKTREFIFLQPTI   |           | 360 |
|                | *****                                                         |           |     |
| GIWU01140356.1 | TPIKVQSRDSRRPQAVTLACFVSGFYFAGIYVNWRTERDLQVPGSVTNFPVVRDVSGTYS  |           | 313 |
| GIWU01140354.1 | TPIKVQSRDSRRPQAVTLACFVSGFYFAGIYVNWRTERDLQVPGSVTNFPVVRDVSGTYS  |           | 420 |
|                | *****                                                         |           |     |
| GIWU01140356.1 | TVSQMTIAFVDVDPTQTYMCEVRHESLTNPLRERFQIR*                       | 351       |     |
| GIWU01140354.1 | TVSQMTIAFVDVDPTQTYMCEVRHESLTNPLRERFQIR*                       | 458       |     |
|                | *****                                                         |           |     |

B)

|    |                                                                  |     |
|----|------------------------------------------------------------------|-----|
| C3 | EFIFLQPTITPIKVQSRDSRRPQAVTLACFVSG <b>FYP</b> AGIYVNWRTERDLQVPG   | 53  |
| C2 | ERYPMEPKLYLLSPTLEELVTMEKATLV <b>CLATGFYP</b> AEISFHWFINGNP-VVD   | 52  |
| C1 | APSVSPPLVYFQNPHPEDVFLRKNISLL <b>CAAESFYP</b> DDLFSFSWRVDGEQ-VHR  | 52  |
|    | . : .* : : : * * . . ** : . * : : *                              |     |
| C3 | SVTNFPVVRDVSGTYSTVSQMTIAFVDVDPTQTYM <b>CEVR</b> HESLTNPLRERFQIR- | 107 |
| C2 | SIKIYPPILNINGTYSSQSELTTSQMWNRGTEYTC <b>ETQH</b> MSVPDSIIQTINKTR  | 107 |
| C1 | GVSHSASLLGDNGTYTAISKLVINTSQWIKGSIIS <b>CQV</b> SHGALPSPIIKHISNT- | 106 |
|    | ... : . . ** : : * : : * : : * : : . . : : . .                   |     |

% similarity between constant domains (in Amino acid)

|    |       |       |     |
|----|-------|-------|-----|
|    | C3    | C2    | C1  |
| C3 | ---   |       |     |
| C2 | 27.27 | ---   |     |
| C1 | 22.22 | 29.25 | --- |

**Supplemental Fig 2. Additional features of nurse shark UrIg. A.** Alternative splicing of C2 domain. **The three constant domains of IgUr are divergent.** The nurse shark UrIg constant domains were aligned using Clustal Omega multiple sequence alignment. Below the matrix shows the % similarity (22-29%), showing that the domains are very divergent. Typical amino acids for C1 IgSF domains are marked in bold letters.
